# Supplementary material for: Gene-Environment Interactions Relevant to Estrogen and Risk of Breast Cancer: Can Gene-Environment Interactions Be Detected Only among Candidate SNPs from Genome-Wide Association Studies?
Source: MDPI journal article supplement (doi:10.3390/cancers13102370), 2021-05-14
Supplement: s1 [file s1]

## Supplementary Materials

# Gene–Environment Interactions Relevant to Estrogen and Risk of Breast Cancer: Can Gene–Environment Interactions Be Detected Only Among Candidate SNPs from Genome-Wide Association Studies?

JooYong Park, Ji-Yeob Choi, Jaesung Choi, Seokang Chung, Nan Song, Sue K. Park, Wonshik Han, Dong-Young Noh, Sei-Hyun Ahn, Jong Won Lee, Mi Kyung Kim, Sun Ha Jee, Wanqing Wen, Manjeet K. Bolla, Qin Wang, Joe Dennis, Kyriaki Michailidou, Mitul Shah, Don M. Conroy, Patricia A. Harrington, Rebecca Mayes, Kamila Czene, Per Hall, Lauren R. Teras, Alpa V. Patel, Fergus J. Couch, Janet E. Olson, Elinor J. Sawyer, Rebecca Roylance, Stig E. Bojesen, Henrik Flyger, Diether Lambrechts, Adinda Baten, Keitaro Matsuo, Hidemi Ito, Pascal Guénel, Thérèse Truong, Renske Keeman, Marjanka K. Schmidt, Anna H. Wu, Chiu-Chen Tseng, Angela Cox, Simon S. Cross, kConFab Investigators, Irene L. Andrulis, John L. Hopper, Melissa C. Southey, Pei-Ei Wu, Chen-Yang Shen, Peter A. Fasching, Arif B. Ekici, Kenneth Muir, Artitaya Lophatananon, Hermann Brenner, Volker Arndt, Michael E. Jones, Anthony J. Swerdlow, Reiner Hoppe, Yon-Dschun Ko, Mikael Hartman, Jingmei Li, Arto Mannermaa, Jaana M. Hartikainen, Javier Benitez, Anna González-Neira, Christopher A. Haiman, Thilo Dörk, Natalia V. Bogdanova, Soo Hwang Teo, Nur Aishah Mohd Taib, Olivia Fletcher, Nichola Johnson, Mervi Grip, Robert Winqvist, Carl Blomqvist, Heli Nevanlinna, Annika Lindblom, Camilla Wendt, Vessela N. Kristensen, NBCS Collaborators, Rob A.E.M. Tollenaar, Bernadette A.M. Heemskerk-Gerritsen, Paolo Radice, Bernardo Bonanni, Ute Hamann, Mehdi Manoochehri, James V. Lacey, Maria Elena Martinez, Alison M. Dunning, Paul D.P. Pharoah, Douglas F. Easton, Keun-Young Yoo and Daehee Kang

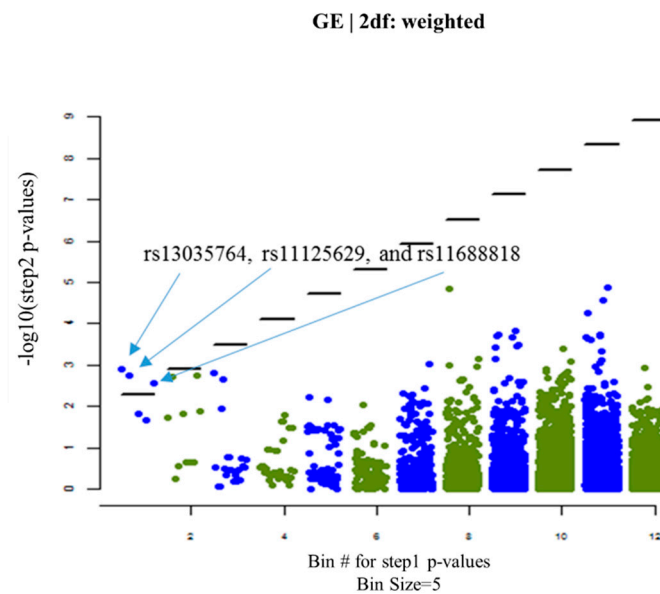

**Figure S1.** Result plot of G×E between 11,555 SNPs and age at menarche for breast cancer risk by using weighted GE|2df method.

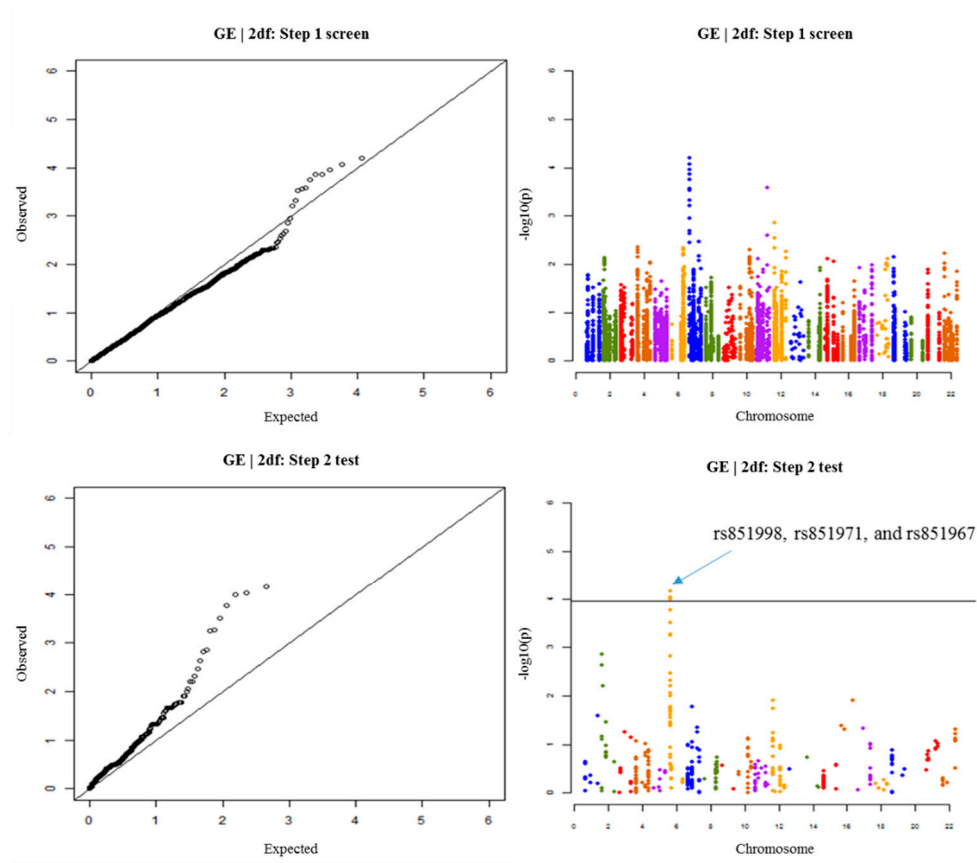

**Figure S2.** Result plot of GxE between 11,555 SNPs and height for breast cancer risk by using GE|2df method.

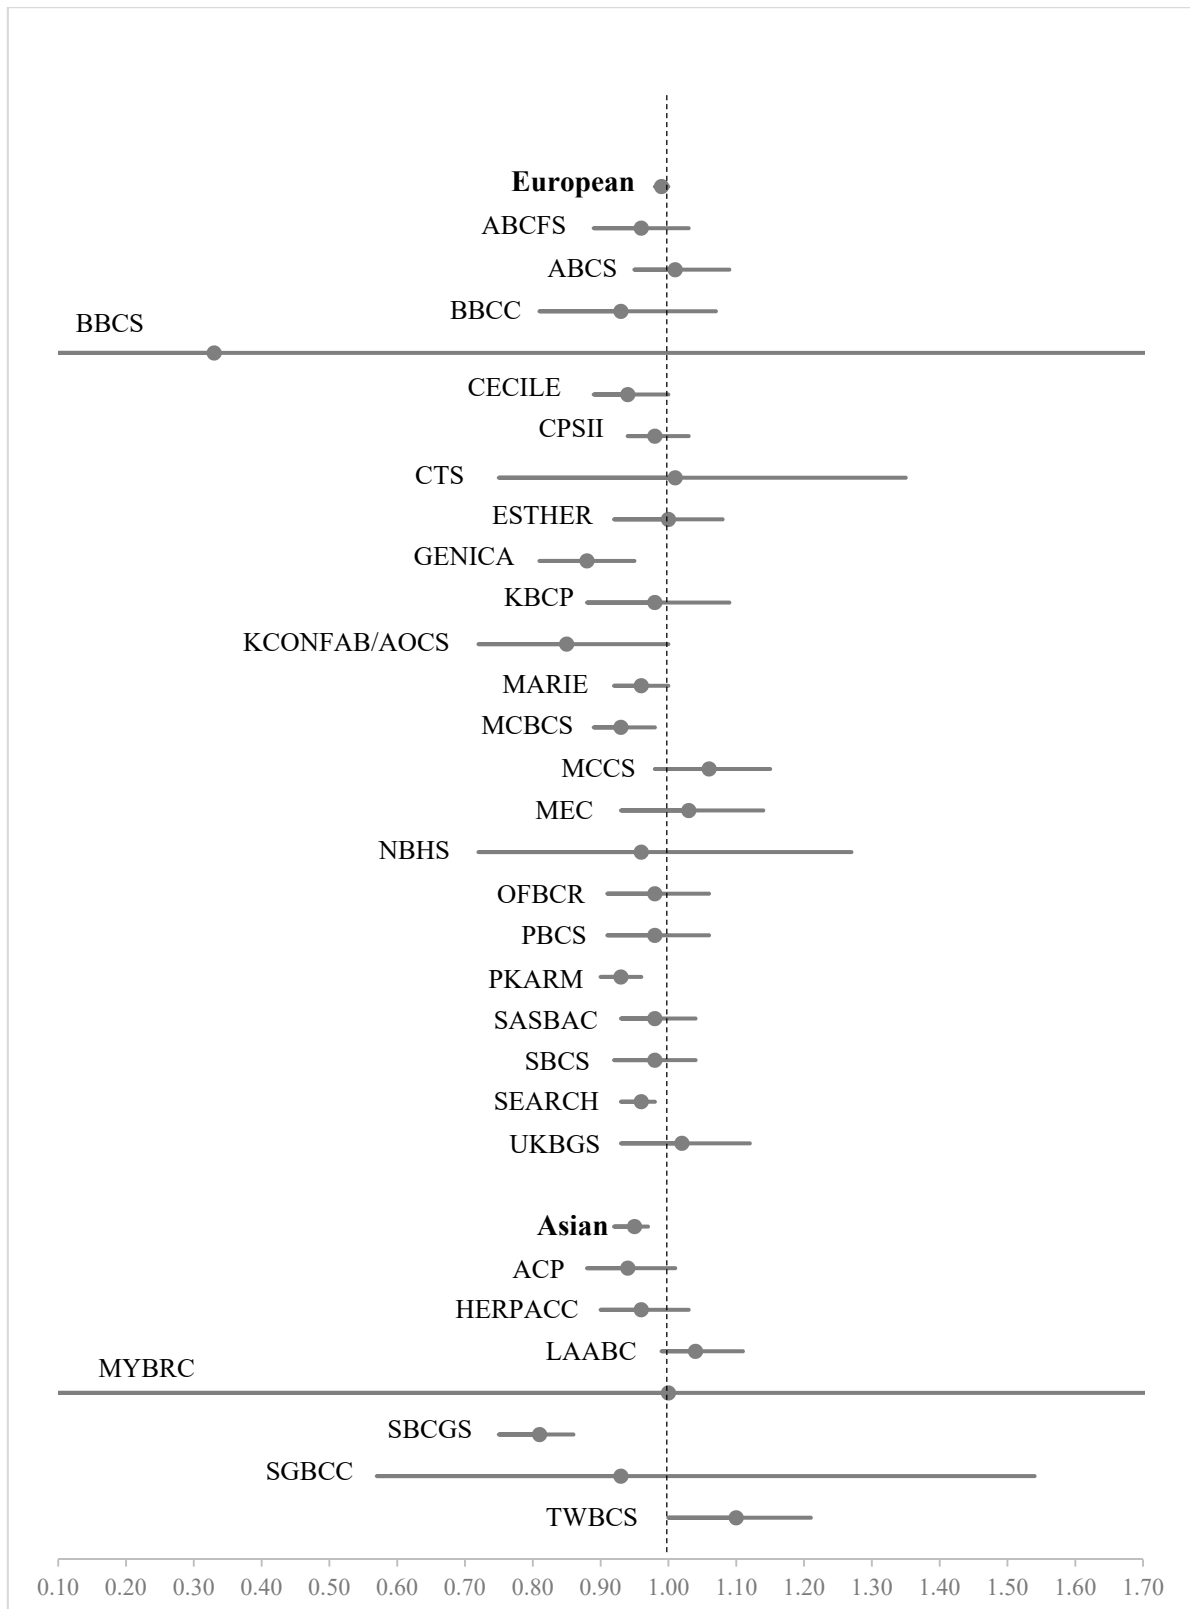

**Figure S3.** Forest plot presenting risk of age at menarche for breast cancer by study in BCAC.

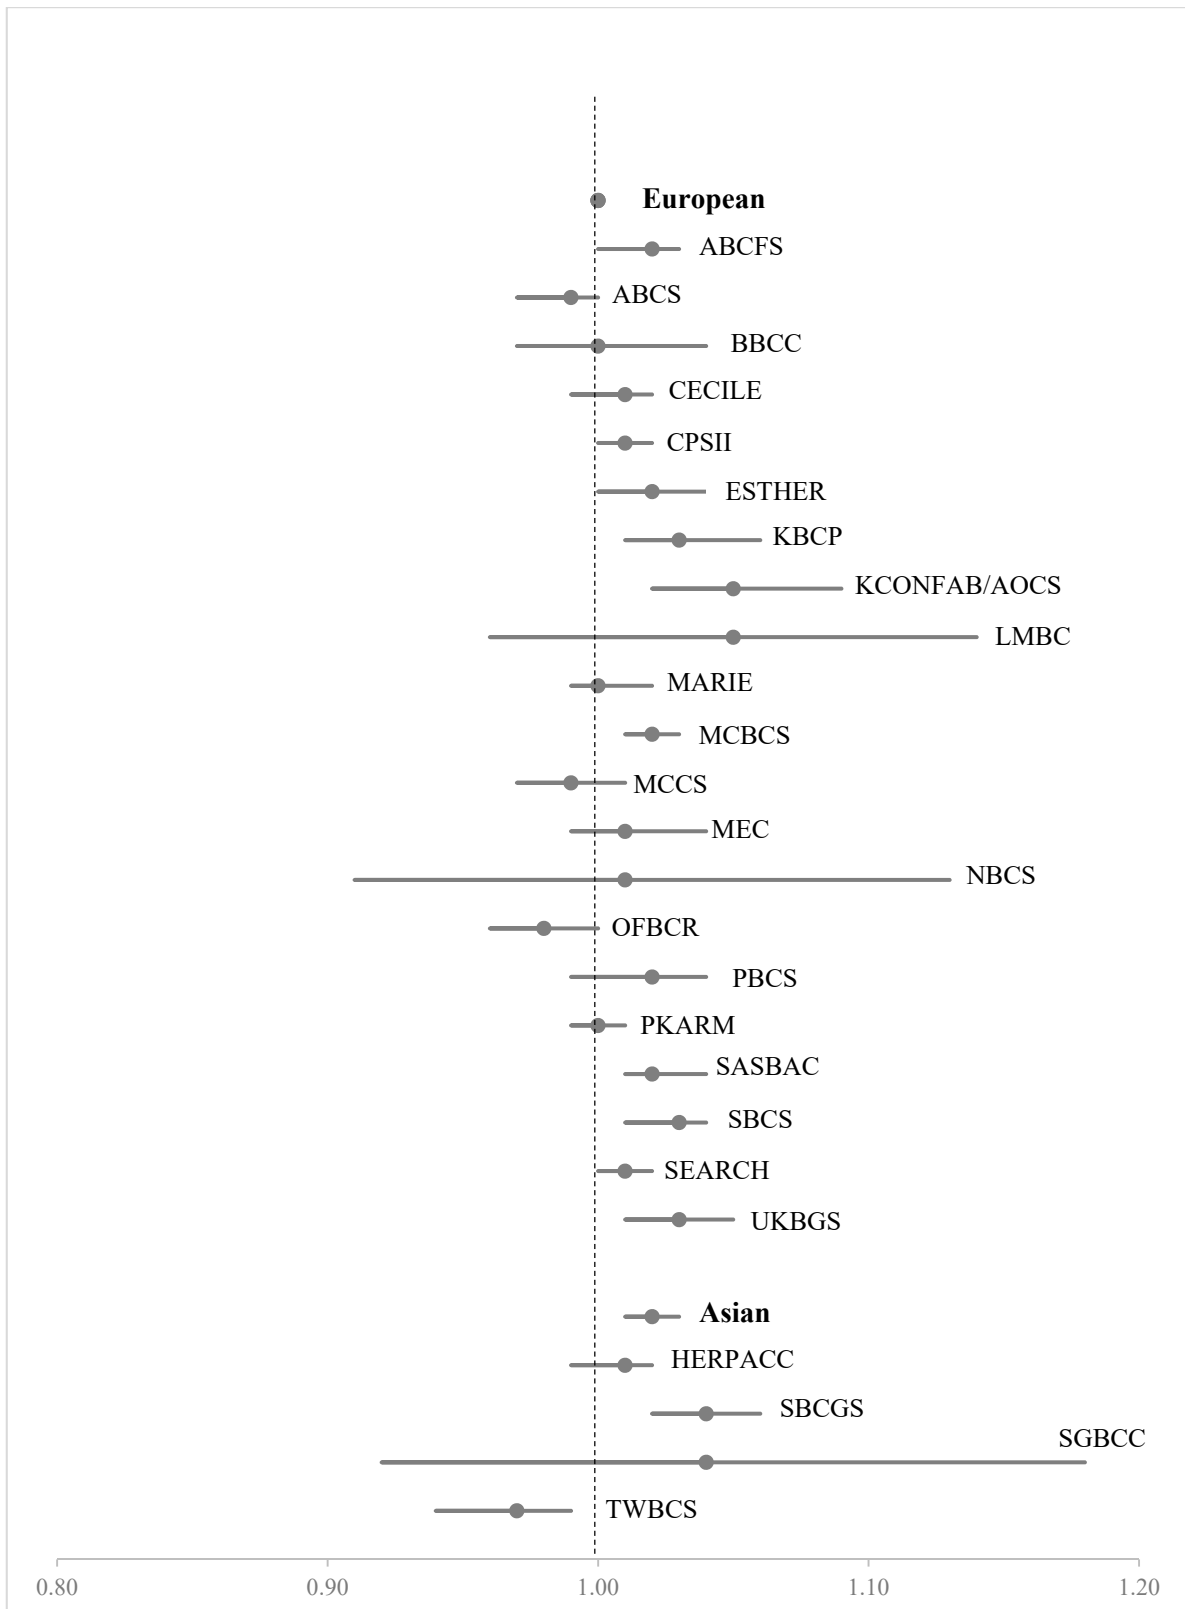

**Figure S4.** Forest plot presenting risk of height for breast cancer by study in BCAC.

**Table S1.** Distributions of demographic and reproductive factors and associations with the risk of breast cancer, Seoul Breast Cancer Study (Pre-imputation).

| Demographic and reproductive factors      | Cases        |      | Controls     |      | OR <sup>c</sup> | 95% CI            |           |
|-------------------------------------------|--------------|------|--------------|------|-----------------|-------------------|-----------|
|                                           | N = 1970     |      | N = 2052     |      |                 |                   | p         |
|                                           | Mean ± SD    | %    | Mean ± SD    | %    |                 |                   |           |
| Age                                       | 49.0 ± 8.26  |      | 51.4 ± 7.75  |      | <0.0001         | 0.99              | 0.98–1.01 |
| <40 years                                 |              | 11.3 |              | 0.1  |                 |                   |           |
| 40–49 years                               |              | 47.8 |              | 47.9 |                 |                   |           |
| 50–59 years                               |              | 27.9 |              | 35.0 |                 |                   |           |
| 60–69 years                               |              | 11.6 |              | 16.1 |                 |                   |           |
| 70+ years                                 |              | 1.4  |              | 0.9  |                 |                   |           |
| Family history, yes                       |              | 4.8  |              | 1.8  | <0.0001         | 2.58              | 1.72–3.87 |
| Height                                    | 157.9 ± 5.05 |      | 155.9 ± 5.08 |      | <0.0001         | 1.07              | 1.06–1.09 |
| BMI (kg/m <sup>2</sup> )                  | 23.2 ± 2.95  |      | 23.7 ± 3.00  |      | <0.0001         | 0.98              | 0.95–1.00 |
| Menarche age                              | 14.8 ± 1.65  |      | 15.2 ± 1.82  |      | <0.0001         | 0.90              | 0.87–0.94 |
| Ever pregnancy                            |              | 93.5 |              | 92.8 | 0.4026          | 0.19              | 0.10–0.34 |
| Age at FFTP <sup>a</sup>                  | 25.9 ± 3.49  |      | 25.1 ± 3.41  |      | <0.0001         | 1.05              | 1.03–1.07 |
| No. of children                           | 2.2 ± 0.85   |      | 2.3 ± 0.91   |      | 0.0003          | 1.07              | 0.98–1.18 |
| Never breastfeeding                       |              | 22.3 |              | 14.5 | <0.0001         | 1.28 <sup>d</sup> | 1.07–1.54 |
| Breastfeeding duration (months)           | 18.0 ± 22.59 |      | 24.0 ± 21.53 |      | <0.0001         | 0.99 <sup>d</sup> | 0.99–1.00 |
| Breastfeeding duration per child (months) | 7.3 ± 8.01   |      | 9.9 ± 7.27   |      | <0.0001         | 0.97 <sup>d</sup> | 0.95–0.98 |
| Duration of EEBF <sup>b</sup>             | 12.3 ± 6.22  |      | 10.5 ± 5.36  |      | <0.0001         | 1.05 <sup>e</sup> | 1.04–1.07 |
| Postmenopausal women                      |              | 38.2 |              | 54.8 | <0.0001         | 0.56              | 0.46–0.67 |
| Age at menopause                          | 48.5 ± 5.40  |      | 49.2 ± 4.55  |      | 0.0058          | 0.97              | 0.94–0.99 |

<sup>a</sup> FFTP first full-term pregnancy (years); <sup>b</sup> EEBF estrogen exposure before the first full-term pregnancy (years); <sup>c</sup> ORs analyzed by logistic regression adjusting for age, family history, categorical FFTP, age at menarche, and menopausal status; <sup>d</sup> ORs analyzed by logistic regression adjusting for age, family history, categorical FFTP, age at menarche, menopausal status and the number of children; <sup>e</sup> ORs analyzed by logistic regression adjusting for age, family history, ever pregnancy and menopausal status.

**Table S2.** Distributions of demographic and reproductive factors in cases and controls by birth year groups, Seoul Breast Cancer Study (Imputed + binary).

| Demographic and reproductive factors                | Cases (N = 1970) |        |           |        |           |        | Controls (N = 2052) |        |           |        |           |        | <i>p</i> <sup>a</sup> |
|-----------------------------------------------------|------------------|--------|-----------|--------|-----------|--------|---------------------|--------|-----------|--------|-----------|--------|-----------------------|
|                                                     | 1940             |        | 1950      |        | 1960      |        | 1940                |        | 1950      |        | 1960      |        |                       |
|                                                     | (N = 451)        |        | (N = 802) |        | (N = 717) |        | (N = 450)           |        | (N = 859) |        | (N = 743) |        |                       |
| Age, mean (sd)                                      | 61.1             | (4.8)  | 49.3      | (3.0)  | 41.2      | (3.3)  | 63.3                | (3.7)  | 51.7      | (2.8)  | 43.8      | (2.12) | <0.0001               |
| <40 years (%)                                       | -                |        | -         |        | 31.1      |        | -                   |        | -         |        | 0.3       |        |                       |
| 40–49 years (%)                                     | -                |        | 56.0      |        | 68.8      |        | -                   |        | 28.1      |        | 99.7      |        |                       |
| 50–59 years (%)                                     | 43.7             |        | 44.0      |        | -         |        | 22.4                |        | 71.9      |        | -         |        |                       |
| 60–69 years (%)                                     | 50.3             |        | -         |        | -         |        | 73.3                |        | -         |        | -         |        |                       |
| 70+ years (%)                                       | 6.0              |        | -         |        | -         |        | 4.2                 |        | -         |        | -         |        |                       |
| Family history, yes (%)                             | 5.8              |        | 5.0       |        | 4.0       |        | 1.1                 |        | 2.3       |        | 1.5       |        | 0.0580                |
| Height(cm), mean (sd)                               | 156.2            | (5.1)  | 157.8     | (4.9)  | 159.0     | (4.9)  | 154.0               | (5.1)  | 155.7     | (4.9)  | 157.3     | (4.7)  | <0.0001               |
| < 160cm (%)                                         | 69.8             |        | 59.5      |        | 53.3      |        | 87.6                |        | 77.2      |        | 66.9      |        |                       |
| ≥ 160cm (%)                                         | 30.2             |        | 40.5      |        | 46.7      |        | 12.4                |        | 22.8      |        | 33.1      |        |                       |
| BMI (kg/m <sup>2</sup> ), mean (SD)                 | 24.6             | (2.9)  | 23.2      | (2.8)  | 22.4      | (2.8)  | 24.7                | (2.9)  | 23.7      | (2.9)  | 23.0      | (2.9)  | <0.0001               |
| < 25 (%)                                            | 62.3             |        | 78.3      |        | 84.2      |        | 58.0                |        | 71.1      |        | 79.1      |        |                       |
| ≥ 25 (%)                                            | 37.7             |        | 21.7      |        | 15.8      |        | 42.0                |        | 28.9      |        | 20.9      |        |                       |
| Menarche age, mean (SD)                             | 15.6             | (1.8)  | 14.9      | (1.6)  | 14.1      | (1.4)  | 16.1                | (1.7)  | 15.3      | (1.8)  | 14.7      | (1.6)  | <0.0001               |
| ≥ 14 years (%)                                      | 86.9             |        | 81.4      |        | 71.1      |        | 93.8                |        | 86.4      |        | 78.2      |        |                       |
| <14 years (%)                                       | 13.1             |        | 18.6      |        | 28.9      |        | 6.2                 |        | 13.6      |        | 21.8      |        |                       |
| Ever pregnancy (%)                                  | 95.8             |        | 94.9      |        | 90.5      |        | 92.9                |        | 93.4      |        | 92.2      |        | <0.0001               |
| Age at FFTP <sup>b</sup> , mean (SD)                | 25.1             | (3.7)  | 25.7      | (3.4)  | 26.8      | (3.3)  | 24.4                | (3.0)  | 24.9      | (3.3)  | 25.8      | (3.5)  | <0.0001               |
| <27 years (%)                                       | 66.7             |        | 59.1      |        | 44.6      |        | 70.2                |        | 70.7      |        | 59.1      |        |                       |
| Nulliparity or ≥ 27 years (%)                       | 33.3             |        | 40.9      |        | 55.4      |        | 29.8                |        | 29.3      |        | 40.9      |        |                       |
| No. of children, mean (SD)                          | 2.8              | (1.2)  | 2.1       | (0.7)  | 1.9       | (0.6)  | 3.1                 | (1.2)  | 2.1       | (0.7)  | 2.0       | (0.6)  | <0.0001               |
| ≥ 2 (%)                                             | 90.1             |        | 84.9      |        | 82.4      |        | 96.2                |        | 88.2      |        | 83.5      |        |                       |
| <2 (%)                                              | 10.0             |        | 15.1      |        | 17.6      |        | 3.8                 |        | 11.9      |        | 16.5      |        |                       |
| Never breastfeeding (%)                             | 12.8             |        | 19.1      |        | 32.3      |        | 8.5                 |        | 11.9      |        | 21.3      |        | <0.0001               |
| Breastfeeding duration (months), mean (SD)          | 40.8             | (30.8) | 19.7      | (15.2) | 11.7      | (11.4) | 41.9                | (28.5) | 24.0      | (16.9) | 15.1      | (12.6) | <0.0001               |
| Breastfeeding duration per child (months), mean(SD) | 11.2             | (9.6)  | 7.2       | (7.5)  | 4.1       | (5.2)  | 12.4                | (8.9)  | 10.6      | (6.9)  | 7.3       | (6.1)  | <0.0001               |
| ≥2.5 month (%)                                      | 63.9             |        | 49.4      |        | 28.5      |        | 74.6                |        | 74.1      |        | 57.8      |        |                       |
| <2.5 month (%)                                      | 36.1             |        | 50.6      |        | 71.5      |        | 25.4                |        | 25.9      |        | 42.2      |        |                       |
| Duration of EEBF <sup>c</sup> (years), mean (SD)    | 10.9             | (8.2)  | 12.1      | (6.6)  | 14.0      | (5.7)  | 11.1                | (10.4) | 11.4      | (7.9)  | 12.5      | (6.2)  | <0.0001               |
| < 13 years (%)                                      | 74.3             |        | 68.1      |        | 44.9      |        | 88.9                |        | 79.2      |        | 65.0      |        |                       |
| ≥ 13 years (%)                                      | 25.7             |        | 31.9      |        | 55.1      |        | 11.1                |        | 20.8      |        | 35.0      |        |                       |
| Postmenopausal women (%)                            | 96.7             |        | 34.6      |        | 5.2       |        | 95.5                |        | 71.1      |        | 11.2      |        | <0.0001               |
| Age at menopause, mean (SD)                         | 50.0             | (4.9)  | 47.5      | (4.8)  | 39.6      | (3.5)  | 50.0                | (4.6)  | 49.4      | (3.7)  | 43.4      | (3.5)  | <0.0001               |

<sup>a</sup> *p* for trend (among control subjects) by generalized linear models adjusting for age, family history, ever pregnancy, age at FFTP, and age at menarche; <sup>b</sup> FFTP first full-term pregnancy (years); <sup>c</sup> EEBF estrogen exposure before the first full-term pregnancy (years).

**Table S3.** Studies including BCAC replication data set.

|               |                   |                                                                                                                           |                  | Total |                 | Data Set for<br>Age at Menarche x NCOA1<br>(N = 71,532) |                  |     | Data Set for<br>Height x ESR1<br>(N = 62,152) |                  |     |
|---------------|-------------------|---------------------------------------------------------------------------------------------------------------------------|------------------|-------|-----------------|---------------------------------------------------------|------------------|-----|-----------------------------------------------|------------------|-----|
| Ethnicity     | Study Acronym     | Study Name                                                                                                                | Country          | N     | (Cases/Control) | N                                                       | (Cases/Controls) | %   | N                                             | (Cases/Controls) | %   |
| Euro-<br>pean | ABCFS             | Australian Breast Cancer Family Study                                                                                     | Australia        | 1341  | (790/551)       | 1282                                                    | (773/509)        | 1.8 | 1283                                          | (777/506)        | 2.1 |
|               | ABCS              | Amsterdam Breast Cancer Study                                                                                             | Nether-<br>lands | 3900  | (2085/1815)     | 1938                                                    | (778/1160)       | 2.7 | 1939                                          | (779/1160)       | 3.1 |
|               | BBCC              | Bavarian Breast Cancer Cases and Controls                                                                                 | Germany          | 1092  | (634/458)       | 970                                                     | (595/375)        | 1.4 | 1079                                          | (628/451)        | 1.7 |
|               | BBCS              | British Breast Cancer Study                                                                                               | UK               | 2951  | (1554/1397)     | 417                                                     | (206/211)        | 0.6 | 219                                           | (5/214)          | 0.4 |
|               | CECILE            | CECILE Breast Cancer Study                                                                                                | France           | 2018  | (1019/999)      | 1987                                                    | (1004/983)       | 2.8 | 1914                                          | (975/939)        | 3.1 |
|               | CGPS              | Copenhagen General Population Study                                                                                       | Denmark          | 7482  | (2948/4534)     | 1608                                                    | (1608/0)         | 2.3 | 2335                                          | (2335/0)         | 3.8 |
|               | CNIO-BCS          | Spanish National Cancer Centre Breast Cancer Study                                                                        | Spain            | 1773  | (902/871)       | 659                                                     | (5/654)          | 0.9 | 98                                            | (0/98)           | 0.2 |
|               | CPSII             | Cancer Prevention Study-II Nutrition Cohort                                                                               | USA              | 4380  | (2202/2178)     | 4330                                                    | (2173/2157)      | 6.1 | 4350                                          | (2188/2162)      | 7.0 |
|               | CTS               | California Teachers Study                                                                                                 | USA              | 139   | (68/71)         | 114                                                     | (60/54)          | 0.2 | -                                             | -                | -   |
|               | ESTHER            | ESTHER Breast Cancer Study                                                                                                | Germany          | 980   | (478/502)       | 960                                                     | (467/493)        | 1.3 | 960                                           | (471/489)        | 1.5 |
|               | GENICA            | Gene Environment Interaction and Breast Cancer in<br>Germany                                                              | Germany          | 892   | (465/427)       | 890                                                     | (464/426)        | 1.2 | 892                                           | (465/427)        | 1.4 |
|               | GLACIER           | Study to Investigate the Genetics of Lobular Carcinoma<br>In situ in Europe                                               | UK               | 2322  | (2322/0)        | 1894                                                    | (1894/0)         | 2.7 | -                                             | -                | -   |
|               | HEBCS             | Helsinki Breast Cancer Study                                                                                              | Finland          | 2898  | (1664/1234)     | 362                                                     | (362/0)          | 0.5 | 345                                           | (345/0)          | 0.6 |
|               | HMBCS             | Hannover-Minsk Breast Cancer Study                                                                                        | Belarus          | 820   | (690/130)       | 527                                                     | (527/0)          | 0.7 | -                                             | -                | -   |
|               | ICICLE            | Study to Investigate the Genetics of In Situ Carcinoma<br>of the Ductal Subtype                                           | UK               | 2902  | (2902/0)        | 2777                                                    | (2777/0)         | 3.9 | -                                             | -                | -   |
|               | KARBAC            | Karolinska Breast Cancer Study                                                                                            | Sweden           | 1384  | (722/662)       | 353                                                     | (353/0)          | 0.5 | -                                             | -                | -   |
|               | KARMA             | Karolinska Mammography Project for Risk Prediction<br>of Breast Cancer – Cohort Study                                     | Sweden           | 1     | (1/0)           | 1                                                       | (1/0)            | 0.0 | 1                                             | (1/0)            | 0.0 |
|               | KBCP              | Kuopio Breast Cancer Project                                                                                              | Finland          | 696   | (445/251)       | 656                                                     | (410/246)        | 0.9 | 661                                           | (415/246)        | 1.1 |
|               | KCON-<br>FAB/AOCS | Kathleen Cuningham Foundation Consortium for re-<br>search into Familial Breast Cancer/Australian Ovarian<br>Cancer Study | Australia        | 1486  | (588/898)       | 1047                                                    | (567/480)        | 1.5 | 1445                                          | (578/867)        | 2.3 |
|               | LMBC              | Leuven Multidisciplinary Breast Centre                                                                                    | Belgium          | 1802  | (812/990)       | 1705                                                    | (1705/0)         | 2.4 | 2296                                          | (1941/355)       | 3.7 |
|               | MARIE             | Mammary Carcinoma Risk Factor Investigation                                                                               | Germany          | 3596  | (1818/1778)     | 3104                                                    | (1600/1504)      | 4.3 | 3594                                          | (1816/1778)      | 5.8 |

|          |                                                                                          |                                                                      |           |             |            |             |            |        |             |            |
|----------|------------------------------------------------------------------------------------------|----------------------------------------------------------------------|-----------|-------------|------------|-------------|------------|--------|-------------|------------|
| MBCSG    | Milan Breast Cancer Study Group                                                          | Italy                                                                | 888       | (488/400)   | 177        | (177/0)     | 0.3        | 177    | (177/0)     | 0.3        |
| MCBCS    | Mayo Clinic Breast Cancer Study                                                          | USA                                                                  | 3793      | (1878/1915) | 3327       | (1671/1656) | 4.7        | 3493   | (1716/1777) | 5.6        |
| MCCS     | Melbourne Collaborative Cohort Study                                                     | Australia                                                            | 1124      | (690/494)   | 1116       | (627/489)   | 1.6        | 1115   | (626/489)   | 1.8        |
| MEC      | Multiethnic Cohort                                                                       | USA                                                                  | 1472      | (742/730)   | 640        | (298/342)   | 0.9        | 647    | (300/347)   | 1.0        |
| NBCS     | Norwegian Breast Cancer Study                                                            | Norway                                                               | 1952      | (1675/277)  | 37         | (0/37)      | 0.1        | 280    | (58/222)    | 0.5        |
| NBHS     | Nashville Breast Health Study                                                            | USA                                                                  | 932       | (562/320)   | 76         | (36/40)     | 0.1        | -      | -           | -          |
| OBCS     | Oulu Breast Cancer Study                                                                 | Finland                                                              | 921       | (507/414)   | 413        | (413/0)     | 0.6        | -      | -           | -          |
| OFBCR    | Ontario Familial Breast Cancer Registry                                                  | Canada                                                               | 1686      | (1175/511)  | 1441       | (952/489)   | 2.0        | 1443   | (948/495)   | 2.3        |
| ORIGO    | Leiden University Medical Centre Breast Cancer Study                                     | Netherlands                                                          | 684       | (357/327)   | 259        | (259/0)     | 0.4        | -      | -           | -          |
| PBCS     | NCI Polish Breast Cancer Study                                                           | Poland                                                               | 943       | (519/424)   | 936        | (515/421)   | 1.3        | 936    | (514/422)   | 1.5        |
| PKARM    | Karolinska Mammography Project for Risk Prediction of Breast Cancer – Case-Control Study | Sweden                                                               | 11,001    | (5537/5464) | 10,274     | (5228/5046) | 14.4       | 10,552 | (5334/5218) | 17.0       |
| SASBAC   | Singapore and Sweden Breast Cancer Study                                                 | Sweden                                                               | 2541      | (1163/1378) | 2319       | (1058/1261) | 3.2        | 2523   | (1153/1370) | 4.1        |
| SBCS     | Sheffield Breast Cancer Study                                                            | UK                                                                   | 1691      | (843/848)   | 1658       | (826/832)   | 2.3        | 1667   | (827/840)   | 2.7        |
| SEARCH   | Study of Epidemiology and Risk factors in Cancer Heredity                                | UK                                                                   | 17,407    | (9338/8069) | 11,281     | (5971/5310) | 15.8       | 9074   | (6022/3052) | 14.6       |
| SKKDKFZS | Städtisches Klinikum Karlsruhe Deutsches Krebsforschungszentrum Study                    | Germany                                                              | 165       | (136/29)    | 105        | (105/0)     | 0.2        | 133    | (133/0)     | 0.2        |
| UKBGS    | UK Breakthrough Generations Study                                                        | UK                                                                   | 946       | (482/464)   | 845        | (429/416)   | 1.2        | 912    | (467/445)   | 1.5        |
| Asian    | ACP                                                                                      | Asia Cancer Program                                                  | Thailand  | 1059        | (423/636)  | 1053        | (421/632)  | 1.5    | -           | -          |
|          | HERPACC                                                                                  | Hospital-based Epidemiologic Research Program at Aichi Cancer Center | Japan     | 2070        | (694/1376) | 2033        | (686/1347) | 2.8    | 2068        | (694/1374) |
|          | LAABC                                                                                    | Los Angeles County Asian-American Breast Cancer Case-Control Study   | USA       | 1802        | (812/990)  | 1800        | (810/990)  | 2.5    | -           | -          |
|          | MYBRC                                                                                    | Malaysian Breast Cancer Genetic Study                                | Malaysia  | 1380        | (770/610)  | 464         | (291/173)  | 0.7    | -           | -          |
|          | SBCGS                                                                                    | Shanghai Breast Cancer Genetic Study                                 | China     | 1740        | (848/892)  | 1738        | (847/891)  | 2.4    | 1739        | (847/892)  |
|          | SGBCC                                                                                    | Singapore Breast Cancer Cohort                                       | Singapore | 1034        | (532/502)  | 859         | (472/387)  | 1.2    | 870         | (462/408)  |
|          | TWBCS                                                                                    | Taiwanese Breast Cancer Study                                        | Taiwan    | 1125        | (889/236)  | 1100        | (865/235)  | 1.5    | 1112        | (876/236)  |



**Table S4.** Distributions of demographic and reproductive factors and associations with the risk of breast cancer by ethnicity, Breast Cancer Association Consortium replication dataset for age at menarche x NCOA1.

| Demographic and reproductive factors | European     |      |              |      |                 |           | Asian        |      |              |      |                 |           |                |         |
|--------------------------------------|--------------|------|--------------|------|-----------------|-----------|--------------|------|--------------|------|-----------------|-----------|----------------|---------|
|                                      | Cases        |      | Controls     |      | OR <sup>d</sup> | 95% CI    | Cases        |      | Controls     |      | OR <sup>d</sup> | 95% CI    | I <sup>2</sup> | p-Value |
|                                      | N = 36,894   |      | N = 25,591   |      |                 |           | N = 4392     |      | N = 4655     |      |                 |           |                |         |
|                                      | Mean ± SD    | %    | Mean ± SD    | %    |                 |           | Mean ± SD    | %    | Mean ± SD    | %    |                 |           |                |         |
| Age                                  | 57.8 ± 10.65 |      | 56.9 ± 10.41 |      | 1.02            | 1.02–1.02 | 52.7 ± 10.58 |      | 51.3 ± 10.44 |      | 1.03            | 1.02–1.03 | 58.7%          | 0.1195  |
| Family history, yes                  |              | 17.2 |              | 9.9  | 2.00            | 1.90–2.11 |              | 7.0  |              | 2.8  | 5.0             | 1.58–2.46 | 0.0%           | 0.9066  |
| Missing                              |              | 20.4 |              | 17.1 |                 |           |              | 19.9 |              | 31.8 |                 |           |                |         |
| Height                               | 164.3 ± 6.60 |      | 164.5 ± 6.55 |      | 1.00            | 0.99–1.00 | 156.7 ± 5.91 |      | 156.3 ± 5.58 |      | 1.02            | 1.01–1.03 | 95.2%          | <0.0001 |
| < Q3 <sup>a</sup>                    |              | 60.4 |              | 60.8 | 1.00            | reference |              | 43.4 |              | 43.4 | 1.00            | Reference |                |         |
| ≥ Q3 <sup>a</sup>                    |              | 19.7 |              | 21.0 | 0.96            | 0.92–1.00 |              | 21.5 |              | 18.1 | 1.23            | 1.09–1.39 | 93.0%          | 0.0002  |
| Missing                              |              | 19.9 |              | 18.3 |                 |           |              | 35.1 |              | 38.6 |                 |           |                |         |
| Menarche age                         | 13.1 ± 1.58  |      | 13.1 ± 1.56  |      | 0.99            | 0.98–1.00 | 13.7 ± 1.80  |      | 13.8 ± 1.91  |      | 0.95            | 0.92–0.97 | 88.4%          | 0.0034  |
| ≥ Q1 <sup>b</sup>                    |              | 84.0 |              | 84.9 | 1.00            | reference |              | 92.3 |              | 91.7 | 1.00            | Reference |                |         |
| < Q1 <sup>b</sup>                    |              | 16.0 |              | 15.1 | 1.03            | 0.99–1.08 |              | 7.7  |              | 8.3  | 0.97            | 0.82–1.14 | 0.0%           | 0.4618  |
| Ever pregnancy                       |              | 82.6 |              | 85.6 | 0.77            | 0.73–0.81 |              | 84.6 |              | 83.0 | 0.78            | 0.69–0.89 | 0.0%           | 0.8554  |
| Missing                              |              | 2.9  |              | 2.4  |                 |           |              | 1.2  |              | 5.2  |                 |           |                |         |
| Age at FFTP                          | 25.1 ± 4.88  |      | 25.1 ± 4.69  |      | 1.00            | 0.99–1.00 | 26.0 ± 4.50  |      | 25.3 ± 4.15  |      | 1.05            | 1.03–1.06 | 97.8%          | <0.0001 |
| <Q3 <sup>c</sup>                     |              | 52.5 |              | 58.9 | 1.00            | reference |              | 45.0 |              | 36.0 | 1.00            | reference |                |         |
| Nulliparity or ≥Q3 <sup>c</sup>      |              | 35.2 |              | 33.8 | 1.17            | 1.13–1.22 |              | 38.1 |              | 25.1 | 1.14            | 1.03–1.27 | 0.0%           | 0.5944  |
| Missing                              |              | 12.3 |              | 7.2  |                 |           |              | 17.0 |              | 38.9 |                 |           |                |         |
| Postmenopausal women                 |              | 62.9 |              | 68.6 | 0.67            | 0.64–0.70 |              | 36.5 |              | 36.6 | 0.83            | 0.73–0.95 | 89.8%          | 0.0018  |
| Missing                              |              | 8.7  |              | 2.2  |                 |           |              | 24.3 |              | 21.8 |                 |           |                |         |

<sup>a</sup> 169 cm in European, and 160cm in Asian; <sup>b</sup> 12 years old in both European and Asian; <sup>c</sup> 28 years old in both European and Asian; <sup>d</sup> ORs analyzed by logistic regression adjusting for age, family history, categorical FFTP, age at menarche, and menopausal status; FFTP: first full-term pregnancy (years).

**Table S5.** Distributions of demographic and reproductive factors and associations with the risk of breast cancer by ethnicity, Breast Cancer Association Consortium replication dataset for height x ESR1.

| Demographic and reproductive factors | European     |      |              |      |                 |           | Asian        |      |              |      |                 |           |                |         |
|--------------------------------------|--------------|------|--------------|------|-----------------|-----------|--------------|------|--------------|------|-----------------|-----------|----------------|---------|
|                                      | Cases        |      | Controls     |      | OR <sup>d</sup> | 95% CI    | Cases        |      | Controls     |      | OR <sup>d</sup> | 95% CI    | I <sup>2</sup> | p-Value |
|                                      | N = 31,994   |      | N = 24,369   |      |                 |           | N = 2879     |      | N = 2910     |      |                 |           |                |         |
|                                      | Mean ± SD    | %    | Mean ± SD    | %    |                 |           | Mean ± SD    | %    | Mean ± SD    | %    |                 |           |                |         |
| Age                                  | 58.4 ± 11.00 |      | 56.2 ± 10.45 |      | 1.04            | 1.04–1.04 | 52.9 ± 10.48 |      | 51.6 ± 10.08 |      | 1.03            | 1.03–1.04 | 0.0%           | 0.4074  |
| Family history, yes                  |              | 19.1 |              | 9.9  | 1.74            | 1.65–1.83 |              | 8.9  |              | 4.0  | 1.74            | 1.37–2.23 | 0.0%           | 0.9784  |
| Missing                              |              | 9.8  |              | 25.0 |                 |           |              | 2.1  |              | 11.5 |                 |           |                |         |
| Height                               | 164.3 ± 6.61 |      | 164.4 ± 6.62 |      | 1.00            | 1.00–1.00 | 156.7 ± 5.92 |      | 156.3 ± 5.60 |      | 1.02            | 1.01–1.03 | 94.5%          | <0.0001 |
| < Q3 <sup>a</sup>                    |              | 75.5 |              | 74.9 | 1.00            | reference |              | 67.0 |              | 70.9 | 1.00            | Reference |                |         |
| ≥ Q3 <sup>a</sup>                    |              | 24.5 |              | 25.1 | 0.97            | 0.93–1.01 |              | 33.0 |              | 29.1 | 1.22            | 1.08–1.39 | 91.8%          | 0.0005  |
| Menarche age                         | 13.1 ± 1.56  |      | 13.1 ± 1.57  |      | 0.98            | 0.97–0.99 | 13.8 ± 1.71  |      | 13.9 ± 1.83  |      | 0.99            | 0.96–1.03 | 0.0%           | 0.5125  |
| ≥ Q1 <sup>b</sup>                    |              | 78.2 |              | 73.3 | 1.00            | reference |              | 76.6 |              | 74.4 | 1.00            | Reference |                |         |
| < Q1 <sup>b</sup>                    |              | 14.1 |              | 12.6 | 1.09            | 1.03–1.15 |              | 22.4 |              | 23.8 | 0.88            | 0.76–1.01 | 88.0%          | 0.0038  |
| Missing                              |              | 7.7  |              | 14.2 |                 |           |              | 1.0  |              | 1.8  |                 |           |                |         |
| Ever pregnancy                       |              | 83.9 |              | 85.7 | 0.74            | 0.71–0.78 |              | 88.1 |              | 88.2 | 0.84            | 0.70–1.01 | 31.2%          | 0.2281  |
| Missing                              |              | 2.0  |              | 2.7  |                 |           |              | 1.2  |              | 2.5  |                 |           |                |         |
| Age at FFTP                          | 25.0 ± 4.85  |      | 25.1 ± 4.78  |      | 1.00            | 0.99–1.00 | 26.4 ± 4.25  |      | 26.1 ± 3.72  |      | 1.03            | 1.01–1.04 | 91.5%          | 0.0006  |
| <Q3 <sup>c</sup>                     |              | 56.4 |              | 53.6 | 1.00            | reference |              | 54.4 |              | 42.6 | 1.00            | reference |                |         |
| Nulliparity or ≥Q3 <sup>c</sup>      |              | 35.8 |              | 31.8 | 1.14            | 1.10–1.19 |              | 42.0 |              | 28.5 | 1.24            | 1.10–1.40 | 33.1%          | 0.2213  |
| Missing                              |              | 7.8  |              | 14.5 |                 |           |              | 3.6  |              | 28.9 |                 |           |                |         |
| Postmenopausal women                 |              | 67.1 |              | 63.4 | 0.57            | 0.54–0.60 |              | 44.0 |              | 47.2 | 0.80            | 0.67–0.95 | 92.8%          | 0.0002  |
| Missing                              |              | 3.4  |              | 10.6 |                 |           |              | 8.6  |              | 0.9  |                 |           |                |         |

<sup>a</sup> 169 cm in European, and 160cm in Asian; <sup>b</sup> 12 years old in European and 13years old in Asian; <sup>c</sup> 28 years old in both European and Asian; <sup>d</sup> ORs analyzed by logistic regression adjusting for age, family history, categorical FFTP, age at menarche, and menopausal status; FFTP: first full-term pregnancy (years).

**Table S6.** Association between age at menarche and the risk of breast cancer in studies from BCAC that showed consistence with SeBCS.

| Data Set for Age at Menarche x NCOA1 |                    |        |                       | rs13035764      |           | Age at Menarche |      |    |        |    |                 |           |                 |           | p-GxE <sup>d</sup> |
|--------------------------------------|--------------------|--------|-----------------------|-----------------|-----------|-----------------|------|----|--------|----|-----------------|-----------|-----------------|-----------|--------------------|
| Study Acronym                        | Country            | N      | (Cases/Con-<br>trols) | OR <sup>a</sup> | 95% CI    | Mean            | SD   | Q1 | Median | Q3 | OR <sup>b</sup> | 95% CI    | OR <sup>c</sup> | 95% CI    |                    |
| CECILE                               | France             | 1987   | (1004/983)            | 1.11            | 0.97–1.28 | 13.01           | 1.65 | 12 | 13     | 14 | 0.94            | 0.89–1.00 | 1.09            | 0.86–1.37 | 0.5696             |
| GENICA                               | Germany            | 890    | (464/426)             | 1.08            | 0.88–1.32 | 13.54           | 1.71 | 12 | 13     | 15 | 0.88            | 0.81–0.95 | 1.35            | 0.86–2.11 | 0.9250             |
| KCONFAB/AOCS                         | Australia          | 1047   | (567/480)             | 1.23            | 0.86–1.78 | 13.04           | 1.56 | 12 | 13     | 14 | 0.85            | 0.72–1.00 | 1.34            | 0.68–2.64 | 0.4994             |
| MARIE                                | Germany            | 3104   | (1600/1504)           | 1.06            | 0.95–1.18 | 13.59           | 1.68 | 12 | 14     | 15 | 0.96            | 0.92–1.00 | 1.01            | 0.79–1.29 | 0.4253             |
| MCBCS                                | USA                | 3327   | (1671/1656)           | 1.05            | 0.95–1.17 | 12.71           | 1.34 | 12 | 13     | 13 | 0.93            | 0.89–0.98 | 1.30            | 1.08–1.56 | 0.6289             |
| PKARMA                               | Sweden             | 10,274 | (5228/5046)           | 1.00            | 0.93–1.07 | 13.15           | 1.47 | 12 | 13     | 14 | 0.93            | 0.90–0.96 | 1.20            | 1.05–1.37 | 0.1263             |
| SEARCH                               | UK                 | 11,281 | (5971/5310)           | 0.98            | 0.92–1.04 | 12.87           | 1.58 | 12 | 13     | 14 | 0.96            | 0.93–0.98 | 1.03            | 0.94–1.14 | 0.1359             |
| SBCGS                                | China              | 1738   | (847/891)             | 1.09            | 0.92–1.30 | 14.68           | 1.77 | 13 | 15     | 16 | 0.81            | 0.75–0.86 | 1.55            | 1.04–2.31 | 0.0890             |
|                                      | European*          | 31,910 | (16,505/15,405)       | 1.00            | 0.97–1.04 | 13.05           | 1.56 | 12 | 13     | 14 | 0.95            | 0.94–0.97 | 1.10            | 1.04–1.17 | 0.2332             |
|                                      | Total <sup>‡</sup> | 33,648 | (17,352/16,296)       | 0.99            | 0.96–1.02 | 13.13           | 1.61 | 12 | 13     | 14 | 0.96            | 0.94–0.97 | 1.09            | 1.03–1.16 | 0.2006             |

\*Including CECILE, GENICA, KCONFAB/AOCS, MARIE, MCBCS, PKARMA, SEARCH; <sup>‡</sup> European + SBCGS; <sup>a</sup> Risk of SNP for breast cancer; <sup>b</sup> Risk of age at menarche (continuous variable) for breast cancer; <sup>c</sup> Risk of age at menarche (binary variable; age at menarche < Q1) for breast cancer; <sup>d</sup> p for interaction between age at menarche (binary variable) and rs13035764.

**Table S7.** Association between height and the risk of breast cancer in studies from BCAC that showed consistence with SeBCS.

| Data Set for Height x ESR1 |           | N      | (Cases/Con-<br>trols) | rs851998        |           | Height |      |        |        |        | OR <sup>b</sup> | 95% CI    | OR <sup>c</sup> | 95% CI    | p-GxE <sup>d</sup> |
|----------------------------|-----------|--------|-----------------------|-----------------|-----------|--------|------|--------|--------|--------|-----------------|-----------|-----------------|-----------|--------------------|
| Study Acronym              | Country   |        |                       | OR <sup>a</sup> | 95% CI    | Mean   | SD   | Q1     | Median | Q3     |                 |           |                 |           |                    |
| ABCFS                      | Australia | 1283   | (777/506)             | 0.92            | 0.77–1.11 | 163.8  | 6.85 | 158.00 | 163.00 | 168.00 | 1.02            | 1.00–1.03 | 1.32            | 1.03–1.68 | 0.2443             |
| CPSII                      | USA       | 4350   | (2188/2162)           | 1.00            | 0.92–1.10 | 164.2  | 6.32 | 160.02 | 165.10 | 167.64 | 1.01            | 1.00–1.02 | 1.09            | 0.96–1.24 | 0.7166             |
| KBCP                       | Finland   | 661    | (415/246)             | 1.24            | 0.98–1.58 | 161.7  | 6.00 | 158.00 | 162.00 | 165.00 | 1.03            | 1.01–1.06 | 1.66            | 1.15–2.39 | 0.6877             |
| KCONFAB/AOCS               | Australia | 1445   | (578/867)             | 1.06            | 0.73–1.53 | 163.5  | 6.93 | 157.48 | 163.00 | 168.00 | 1.05            | 1.02–1.09 | 1.39            | 0.81–2.41 | 0.5399             |
| MCBCS                      | USA       | 3493   | (1716/1777)           | 1.01            | 0.91–1.12 | 164.9  | 6.80 | 160.02 | 165.10 | 170.18 | 1.02            | 1.01–1.03 | 1.49            | 1.28–1.75 | 0.1401             |
| SASBAC                     | Sweden    | 2523   | (1153/1370)           | 1.00            | 0.89–1.13 | 164.0  | 5.55 | 160.00 | 164.00 | 168.00 | 1.02            | 1.01–1.04 | 1.33            | 1.10–1.59 | 0.0649             |
| SBCS                       | UK        | 1667   | (827/840)             | 0.95            | 0.82–1.11 | 161.9  | 6.72 | 157.00 | 163.00 | 168.00 | 1.03            | 1.01–1.04 | 1.50            | 1.18–1.90 | 0.6413             |
| SEARCH                     | UK        | 9074   | (6022/3052)           | 0.90            | 0.80–1.02 | 163.2  | 6.54 | 158.00 | 163.00 | 168.00 | 1.01            | 1.00–1.02 | 1.54            | 1.27–1.85 | 0.1017             |
| UKBGS                      | UK        | 912    | (467/445)             | 0.95            | 0.77–1.16 | 163.6  | 6.48 | 160.00 | 162.60 | 167.60 | 1.03            | 1.01–1.05 | 1.43            | 1.09–1.89 | 0.2281             |
| SBCGS                      | China     | 1739   | (847/892)             | 0.96            | 0.83–1.13 | 157.7  | 5.41 | 154.00 | 158.00 | 161.50 | 1.04            | 1.02–1.06 | 1.29            | 1.00–1.66 | 0.4982             |
|                            | European* | 25,408 | (14,143/11,265)       | 0.99            | 0.95–1.03 | 163.63 | 6.53 | 160.00 | 163.00 | 168.00 | 1.01            | 1.01–1.02 | 1.29            | 1.22–1.38 | 0.6312             |
|                            | Total#    | 27,147 | (14,990/12,157)       | 0.97            | 0.94–1.01 | 163.25 | 6.63 | 158.00 | 163.00 | 168.00 | 1.01            | 1.01–1.02 | 1.33            | 1.25–1.41 | 0.4043             |

\*Including ABCFS, CPSII, KBCP, KCONFAB/AOCS, MCBCS, SASBAC, SBCS, SEARCH, UKBGS; # European + SBCGS; <sup>a</sup> Risk of SNP for breast cancer; <sup>b</sup> Risk of height (continuous variable) for breast cancer; <sup>c</sup> Risk of height (binary variable; age at height < Q1) for breast cancer; <sup>d</sup> p for interaction between height (binary variable) and rs851998.

**Table S8.** Association between environmental factor and breast cancer by genotypes according to ER/PR status, Seoul Breast Cancer Study.

| Exposure                       | Category          | Total             |      |           | ER+               |      |           | ER-               |      |           | Heterogeneity  |         |
|--------------------------------|-------------------|-------------------|------|-----------|-------------------|------|-----------|-------------------|------|-----------|----------------|---------|
|                                |                   | N(Cases/Controls) | OR   | 95% CI    | N(Cases/Controls) | OR   | 95% CI    | N(Cases/Controls) | OR   | 95% CI    | I <sup>2</sup> | p-Value |
| Age at menarche < 14 years old | Overall           | 4022(1970/2052)   | 1.27 | 1.07–1.50 | 3262(1210/2052)   | 1.27 | 1.05–1.54 | 2764(712/2052)    | 1.27 | 1.02–1.59 | 0%             | 1.0000  |
|                                | E   rs13035764_CC | 1963(1007/956)    | 1.19 | 0.95–1.51 | 1576(620/956)     | 1.24 | 0.96–1.61 | 1315(359/956)     | 1.12 | 0.82–1.53 | 0%             | 0.8867  |
|                                | E   rs13035764_CG | 1706(810/896)     | 1.17 | 0.89–1.53 | 1384(488/896)     | 1.09 | 0.77–1.46 | 1201(305/896)     | 1.28 | 0.90–1.82 | 0%             | 0.7887  |
|                                | E   rs13035764_GG | 337(147/190)      | 2.85 | 1.43–5.67 | 290(100/190)      | 3.08 | 1.47–6.47 | 234(44/190)       | 2.76 | 1.11–6.92 | 0%             | 0.9808  |
| Height ≥ 160cm                 | Marginal          | 4022(1970/2052)   | 1.92 | 1.67–2.20 | 3262(1210/2052)   | 1.90 | 1.62–2.22 | 2764(712/2052)    | 1.86 | 1.54–2.24 | 0%             | 0.9642  |
|                                | E   rs851998_GG   | 1281(677/604)     | 1.53 | 1.20–1.95 | 1011(407/604)     | 1.52 | 1.15–2.01 | 863(259/604)      | 1.49 | 1.09–2.05 | 0%             | 0.9915  |
|                                | E   rs851998_GA   | 1921(938/983)     | 2.03 | 1.65–2.49 | 1573(590/983)     | 1.96 | 1.56–2.47 | 1306(323/983)     | 2.00 | 1.52–2.64 | 0%             | 0.9755  |
|                                | E   rs851998_AA   | 819(355/464)      | 2.39 | 1.74–3.29 | 677(213/464)      | 2.51 | 1.74–3.63 | 594(130/464)      | 2.27 | 1.46–3.53 | 0%             | 0.9425  |
| Exposure                       | Category          | Total             |      |           | PR+               |      |           | PR-               |      |           | Heterogeneity  |         |
|                                |                   | N(Cases/Controls) | OR   | 95% CI    | N(Cases/Controls) | OR   | 95% CI    | N(Cases/Controls) | OR   | 95% CI    | I <sup>2</sup> | p-Value |
| Age at menarche < 14years old  | Overall           | 4022(1970/2052)   | 1.27 | 1.07–1.50 | 3126(1074/2052)   | 1.22 | 1.00–1.50 | 3941(1955/1986)   | 1.34 | 1.09–1.66 | 0%             | 0.8254  |
|                                | E   rs13035764_CC | 1963(1007/956)    | 1.19 | 0.95–1.51 | 1512(556/956)     | 1.18 | 0.90–1.56 | 1378(422/956)     | 1.26 | 0.94–1.68 | 0%             | 0.9396  |
|                                | E   rs13035764_CG | 1706(810/896)     | 1.17 | 0.89–1.53 | 1326(430/896)     | 1.03 | 0.74–1.44 | 1257(361/896)     | 1.26 | 0.90–1.77 | 0%             | 0.7017  |
|                                | E   rs13035764_GG | 337(147/190)      | 2.85 | 1.43–5.67 | 275(85/190)       | 3.19 | 1.48–6.85 | 251(61/190)       | 2.57 | 1.09–6.06 | 0%             | 0.9336  |
| Height ≥ 160cm                 | Marginal          | 4022(1970/2052)   | 1.92 | 1.67–2.20 | 3126(1074/2052)   | 2.05 | 1.74–2.42 | 2899(847/2052)    | 1.70 | 1.42–2.03 | 14.4%          | 0.3108  |
|                                | E   rs851998_GG   | 1281(677/604)     | 1.53 | 1.20–1.95 | 979(375/604)      | 1.62 | 1.22–2.17 | 895(291/604)      | 1.37 | 1.01–1.87 | 0%             | 0.7374  |
|                                | E   rs851998_GA   | 1921(938/983)     | 2.03 | 1.65–2.49 | 1503(520/983)     | 2.16 | 1.70–2.75 | 1375(392/983)     | 1.73 | 1.33–2.24 | 0%             | 0.4484  |
|                                | E   rs851998_AA   | 819(355/464)      | 2.39 | 1.74–3.29 | 643(179/464)      | 2.66 | 1.80–3.93 | 628(164/464)      | 2.29 | 1.53–3.44 | 0%             | 0.8618  |

ORs analyzed by logistic regression adjusting for age, family history, categorical FFTP, age at menarche, and menopausal status.
